# Supplementary material for: Elevated Baseline Neutrophil Count Correlates with Worse Outcomes in Patients with Muscle-Invasive Bladder Cancer Treated with Chemoradiation
Source: MDPI journal article supplement (doi:10.3390/cancers15061886), 2023-03-21
Supplement: s1 [file s1]

**Table S1.** Neoadjuvant chemotherapy and chemoradiation characteristics (n=194)

|                                                |                    |
|------------------------------------------------|--------------------|
| <b>Neoadjuvant chemotherapy, n(%)</b>          | 24 (12%)           |
| Gemcitabine-Cisplatin                          | 8(33.3%)           |
| Methotrexate-Vinblastine-Doxorubicin-Cisplatin | 2(8.3%)            |
| Cisplatin-Etoposide                            | 3(12.5%)           |
| Carboplatin-Etoposide                          | 1(4.2%)            |
| Carboplatin-5Fluorouracil                      | 1(4.2%)            |
| Carboplatin-Gemcitabine                        | 1(4.2%)            |
| Unknown chemotherapy                           | 8(33.3%)           |
| <b>Radiation therapy</b>                       |                    |
| <b>Pelvic dose (Gy)</b>                        |                    |
| Median [range]                                 | 45.0 [45.0 - 60.0] |
| <b>Bladder dose (Gy)</b>                       |                    |
| Median [range]                                 | 64.8 [50.0 - 70.0] |
| <b>Overall treatment time (weeks)</b>          |                    |
| Median [range]                                 | 7.0 [1.4 - 20.6]   |
| <b>Interruption, n(%)</b>                      |                    |
| Yes                                            | 21 (11%)           |
| Missing                                        | 6                  |
| <b>Technique, n(%)</b>                         |                    |
| 2D/3D                                          | 97 (51.6%)         |
| IMRT                                           | 91 (48.4%)         |
| Missing                                        | 6                  |
| <b>Concurrent chemotherapy</b>                 |                    |
| <b>Platinum-based, n(%)</b>                    | 173 (89%)          |
| <b>Other, n(%)</b>                             | 20 (10%)           |
| <b>Missing, n(%)</b>                           | 1 (1%)             |
| <b>Interruption, n(%)</b>                      | 50 (29%)           |
| Missing                                        | 21                 |

Abbreviations: Gy: gray; 2D: two-dimensional ; 3D: three-dimensional ; IMRT: Intensity-modulated radiotherapy
