# Supplementary material for: Elevated Baseline Neutrophil Count Correlates with Worse Outcomes in Patients with Muscle-Invasive Bladder Cancer Treated with Chemoradiation
Source: MDPI journal article supplement (doi:10.3390/cancers15061886), 2023-03-21
Supplement: s1 [file s1]

**Table S2.** Acute and late toxicities

|                                                      |           |
|------------------------------------------------------|-----------|
| <b>Maximum acute toxicity, <i>n</i>(%)</b>           |           |
| Grade 0                                              | 30 (16%)  |
| Grade 1                                              | 113 (60%) |
| Grade 2                                              | 36 (19%)  |
| Grade 3                                              | 10 (5%)   |
| Missing                                              | 5         |
| <b>Acute haematological toxicity, <i>n</i>(%)</b>    |           |
| Grade 0                                              | 138 (74%) |
| Grade 1                                              | 31 (16%)  |
| Grade 2                                              | 15 (8%)   |
| Grade 3                                              | 4 (2%)    |
| Missing                                              | 6         |
| <b>Acute renal toxicity, <i>n</i>(%)</b>             |           |
| Grade 0                                              | 170 (90%) |
| Grade 1                                              | 19 (10%)  |
| Missing                                              | 5         |
| <b>Acute cardiac toxicity, <i>n</i>(%)</b>           |           |
| Grade 0                                              | 184 (97%) |
| Grade 1                                              | 5 (3%)    |
| Missing                                              | 5         |
| <b>Acute urinary toxicity, <i>n</i>(%)</b>           |           |
| Grade 0                                              | 74 (39%)  |
| Grade 1                                              | 94 (50%)  |
| Grade 2                                              | 19 (10%)  |
| Grade 3                                              | 2 (1%)    |
| Missing                                              | 5         |
| <b>Acute Gastro-intestinal toxicity, <i>n</i>(%)</b> |           |
| Grade 0                                              | 84 (45%)  |
| Grade 1                                              | 89 (47%)  |
| Grade 2                                              | 12 (6%)   |
| Grade 3                                              | 4 (2%)    |
| Missing                                              | 5         |
| <b>Maximum late toxicity, <i>n</i>(%)</b>            |           |
| Grade 0                                              | 98 (63%)  |
| Grade 1                                              | 56 (36%)  |
| Grade 2                                              | 2 (1%)    |
| Missing                                              | 38        |
| <b>Late urinary toxicity, <i>n</i>(%)</b>            |           |
| Grade 0                                              | 103 (66%) |
| Grade 1                                              | 51 (33%)  |
| Grade 2                                              | 2 (1%)    |
| Missing                                              | 38        |
| <b>Late Gastro-intestinal toxicity, <i>n</i>(%)</b>  |           |
| Grade 0                                              | 140 (90%) |
| Grade 1                                              | 16 (10%)  |
| Missing                                              | 38        |
